# Supplementary figures and images for: Optimal evolutionary decision-making to store immune memory
Source: eLife journal article supplement (doi:10.7554/elife.61346), 2021-04-28

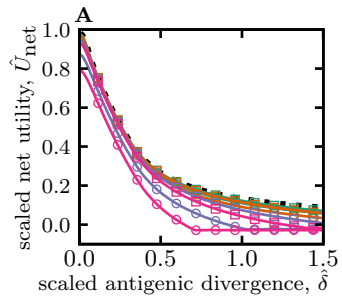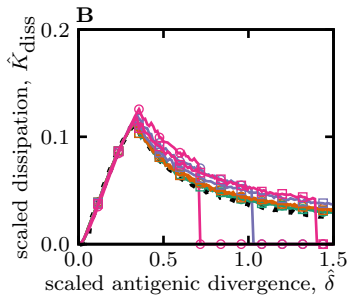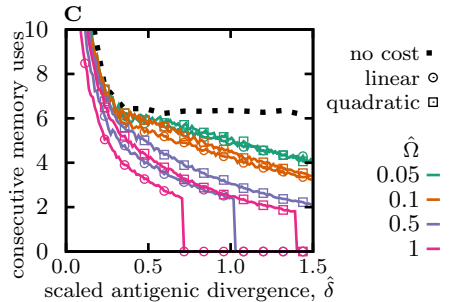

Supplement: supp [file elife-61346-supp-v1.zip]

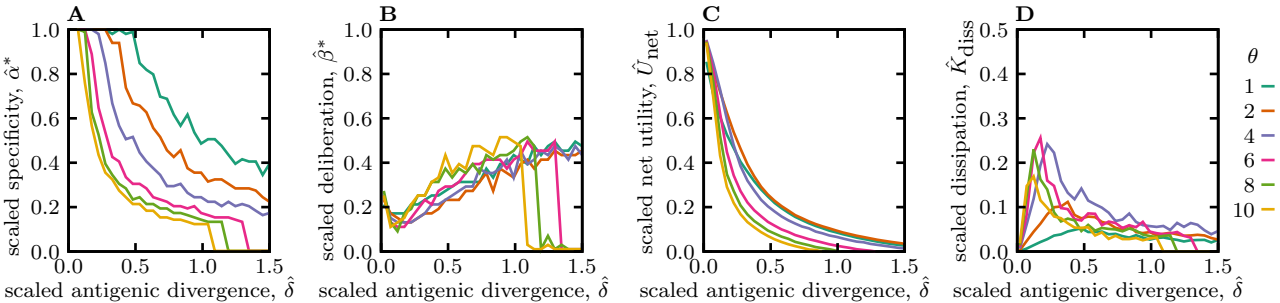

Supplement: supp [file elife-61346-supp-v1.zip]

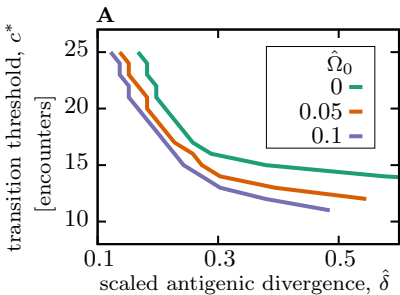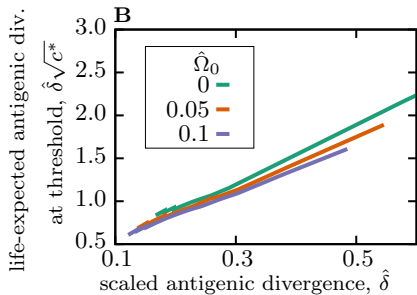

Supplement: supp [file elife-61346-supp-v1.zip]

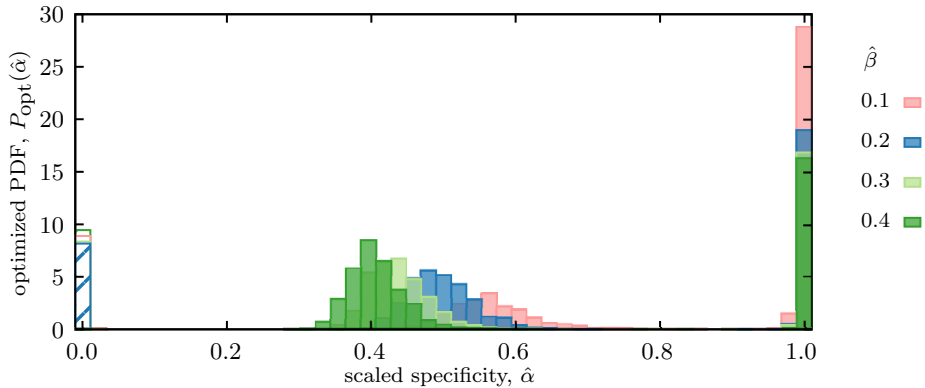

Supplement: supp [file elife-61346-supp-v1.zip]

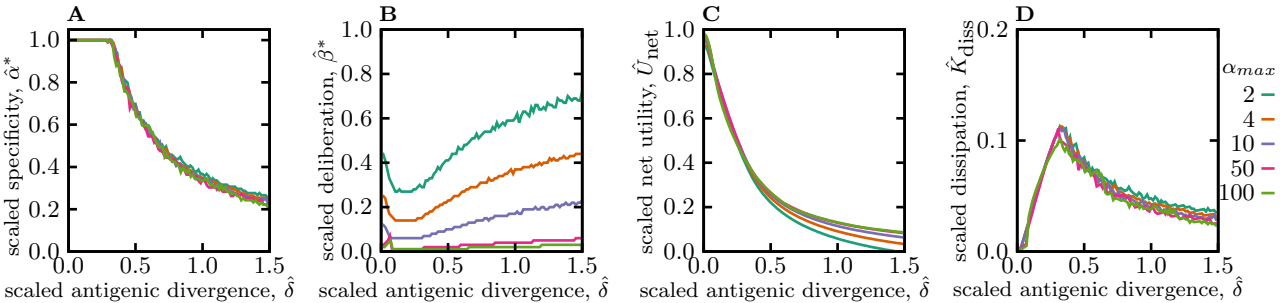

Supplement: supp [file elife-61346-supp-v1.zip]
